# Supplementary material for: Epidemiological Survey of Grapevine Leafroll-Associated Virus 1 and 3 in Sicily (Italy): Genetic Structure and Molecular Variability
Source: MDPI journal article supplement (doi:10.3390/agriculture12050647), 2022-04-29

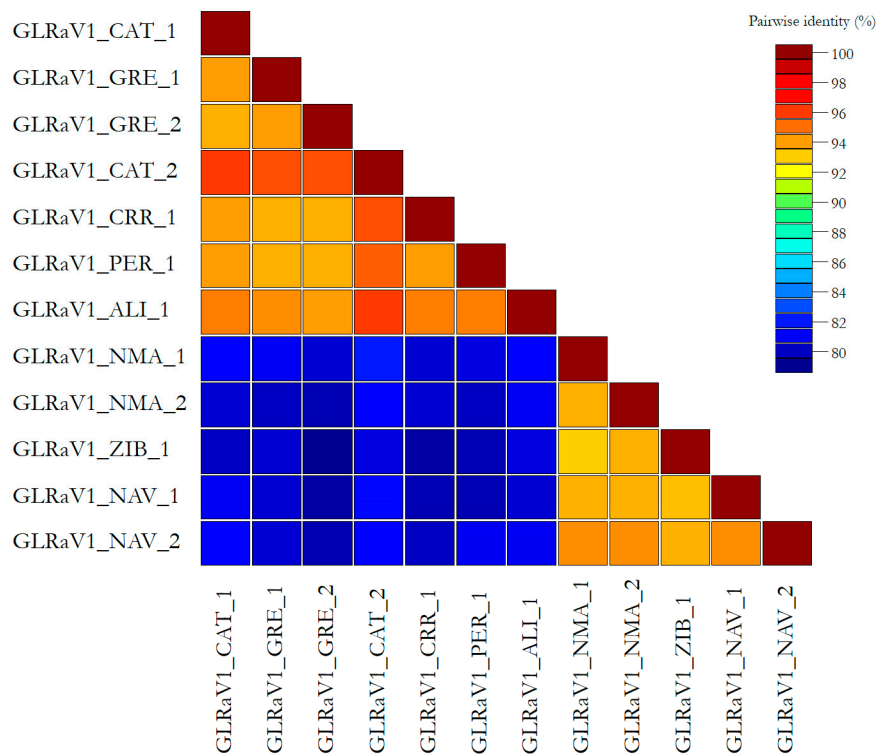

**Figure S1.** Nucleotide pairwise percent identity of the sequenced coat protein gene between the Sicilian GLRaV-1 isolates using SDTv1.2 program. The percentage to the identity score between two sequences is indicated by each colored key.

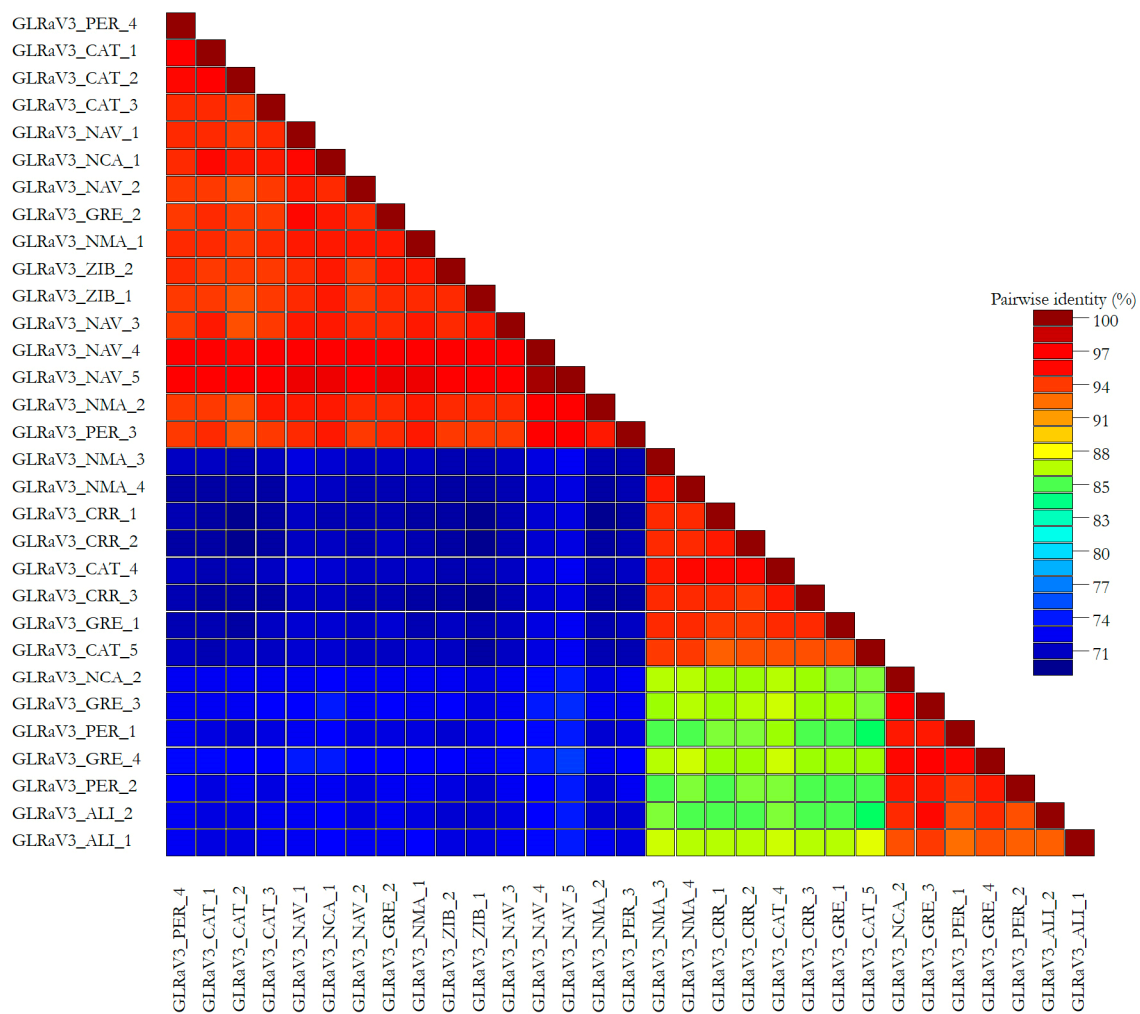

**Figure S2.** Nucleotide pairwise percent identity of the sequenced coat protein gene between the Sicilian GLRaV-3 isolates using the SDTv1.2 program. The percentage to the identity score between two sequences is indicated by each colored key.

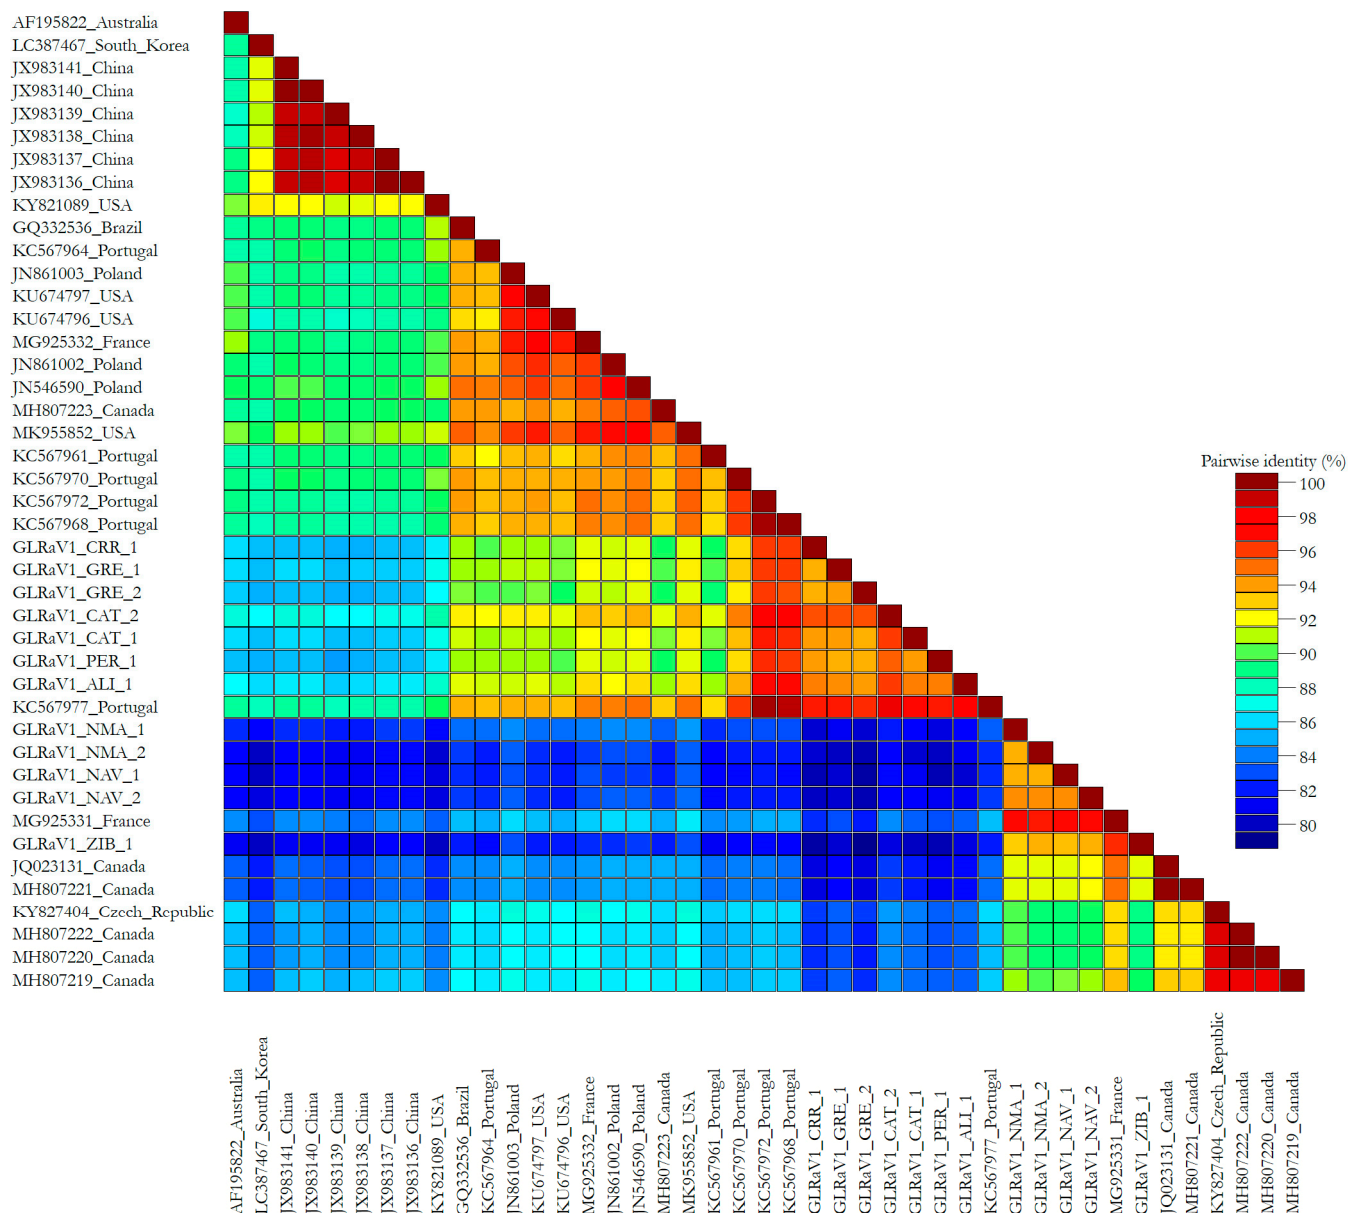

**Figure S3.** Nucleotide pairwise percent identity of the sequenced coat protein gene between the Sicilian GLRaV-1 isolates and reference isolates using the SDTv1.2 program. The percentage to the identity score between two sequences is indicated by each colored key.

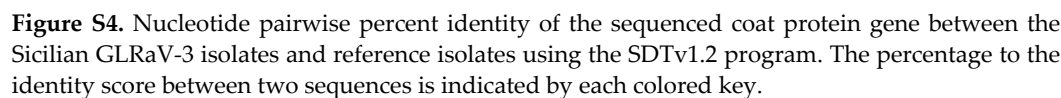

Supplement: s1 [file s1]
