# Supplementary material for: Epidemiological Survey of Grapevine Leafroll-Associated Virus 1 and 3 in Sicily (Italy): Genetic Structure and Molecular Variability
Source: MDPI journal article supplement (doi:10.3390/agriculture12050647), 2022-04-29
Supplement: s1 [file s1]

**Table S2.** Nucleotide diversity<sup>a</sup> of Grapevine leafroll-associated virus 3 (GLRaV-3) in different geographical populations.

|                        | n <sup>b</sup> | Poland               | USA                  | Portugal             | China                | Brazil               | Slovakia      | Canada               | Chile                | South Africa         | Pakistan             | Bosnia and Herzegovina | Italy                | Israel        | Croatia       | New Zealand          |
|------------------------|----------------|----------------------|----------------------|----------------------|----------------------|----------------------|---------------|----------------------|----------------------|----------------------|----------------------|------------------------|----------------------|---------------|---------------|----------------------|
| Poland                 | 2              | <b>0.0031±0.0031</b> | 0.0745±0.0397        | 0.0599±0.0281        | 0.0294±0.0156        | 0.0290±0.0150        | 0.0042±0.0023 | 0.1944±0.1063        | 0.0181±0.0147        | 0.1279±0.0680        | 0.0289±0.0265        | 0.0095±0.0037          | 0.1915±0.0394        | 0.0729±0.0365 | 0.0877±0.0438 | 0.2470±0.1235        |
| USA                    | 11             |                      | <b>0.1200±0.1344</b> | 0.0971±0.0314        | 0.0841±0.0274        | 0.0875±0.0286        | 0.0752±0.0444 | 0.2114±0.0665        | 0.0833±0.0344        | 0.1523±0.0489        | 0.0877±0.0379        | 0.0780±0.0288          | 0.2141±0.0277        | 0.1080±0.0488 | 0.0937±0.0423 | 0.2439±0.0740        |
| Portugal               | 5              |                      |                      | <b>0.0811±0.0805</b> | 0.0650±0.0158        | 0.0648±0.0176        | 0.0600±0.0302 | 0.2109±0.0789        | 0.0632±0.0235        | 0.1378±0.0569        | 0.0654±0.0262        | 0.0610±0.0180          | 0.2058±0.0314        | 0.0713±0.0357 | 0.0690±0.0349 | 0.2578±0.0930        |
| China                  | 11             |                      |                      |                      | <b>0.0474±0.0507</b> | 0.0455±0.0125        | 0.0304±0.0165 | 0.2023±0.0689        | 0.0401±0.0157        | 0.1323±0.0491        | 0.0452±0.0193        | 0.0337±0.0114          | 0.1990±0.0257        | 0.0719±0.0232 | 0.0758±0.0259 | 0.2536±0.0642        |
| Brazil                 | 11             |                      |                      |                      |                      | <b>0.0398±0.0315</b> | 0.0302±0.0162 | 0.2037±0.0709        | 0.0402±0.0155        | 0.1285±0.0513        | 0.0379±0.0141        | 0.0312±0.0100          | 0.2026±0.0259        | 0.0492±0.0211 | 0.0944±0.0294 | 0.2534±0.0677        |
| Slovakia               | 1              |                      |                      |                      |                      |                      | <b>n.c.</b>   | 0.1937±0.1127        | 0.0190±0.0149        | 0.1277±0.0727        | 0.0302±0.0274        | 0.0110±0.0042          | 0.1915±0.0444        | 0.0735±0.0000 | 0.0865±0.0000 | 0.2459±0.1229        |
| Canada                 | 4              |                      |                      |                      |                      |                      |               | <b>0.2600±0.2403</b> | 0.1994±0.0892        | 0.2254±0.0696        | 0.2029±0.0956        | 0.1960±0.0726          | 0.2600±0.0388        | 0.2178±0.1113 | 0.2160±0.1064 | 0.2504±0.1006        |
| Chile                  | 4              |                      |                      |                      |                      |                      |               |                      | <b>0.0313±0.0324</b> | 0.1346±0.0592        | 0.0387±0.0255        | 0.0233±0.0111          | 0.1978±0.0326        | 0.0779±0.0339 | 0.0910±0.0394 | 0.2514±0.0994        |
| South Africa           | 6              |                      |                      |                      |                      |                      |               |                      |                      | <b>0.1969±0.1864</b> | 0.1291±0.0646        | 0.1280±0.0499          | 0.2203±0.0284        | 0.1257±0.0803 | 0.1415±0.0766 | 0.2434±0.0856        |
| Pakistan               | 3              |                      |                      |                      |                      |                      |               |                      |                      |                      | <b>0.0526±0.0502</b> | 0.0316±0.0182          | 0.2025±0.0362        | 0.0512±0.0341 | 0.0957±0.0455 | 0.2550±0.1126        |
| Bosnia and Herzegovina | 10             |                      |                      |                      |                      |                      |               |                      |                      |                      |                      | <b>0.0110±0.0116</b>   | 0.1944±0.0261        | 0.0671±0.0204 | 0.0890±0.0268 | 0.2479±0.0656        |
| Italy                  | 32             |                      |                      |                      |                      |                      |               |                      |                      |                      |                      |                        | <b>0.2043±0.1921</b> | 0.2192±0.0464 | 0.2000±0.0481 | 0.2897±0.0448        |
| Israel                 | 1              |                      |                      |                      |                      |                      |               |                      |                      |                      |                      |                        |                      | <b>n.c.</b>   | 0.1046±0.0000 | 0.2645±0.1323        |
| Croatia                | 1              |                      |                      |                      |                      |                      |               |                      |                      |                      |                      |                        |                      |               | <b>n.c.</b>   | 0.2563±0.1282        |
| New Zealand            | 2              |                      |                      |                      |                      |                      |               |                      |                      |                      |                      |                        |                      |               |               | <b>0.2148±0.1868</b> |

Nucleotide diversity within a group is reported in bold in the diagonal, while nucleotide diversity between groups are reported above the diagonal. <sup>a</sup> Nucleotide diversity was measured by the Jukes–Cantor method. <sup>b</sup> Number of isolates for each population; n.c., not calculated.
