# Supplementary material for: Epidemiological Survey of Grapevine Leafroll-Associated Virus 1 and 3 in Sicily (Italy): Genetic Structure and Molecular Variability
Source: MDPI journal article supplement (doi:10.3390/agriculture12050647), 2022-04-29
Supplement: s1 [file s1]

**Table S1.** Nucleotide diversity<sup>a</sup> of Grapevine leafroll-associated virus 1 (GLRaV-1) in different geographical populations.

|                | n <sup>b</sup> | Italy                | Portugal             | Poland               | USA                  | France              | Canada               | Brazil        | China                | South Korea   | Australia     | Czech Republic |
|----------------|----------------|----------------------|----------------------|----------------------|----------------------|---------------------|----------------------|---------------|----------------------|---------------|---------------|----------------|
| Italy          | 12             | <b>0.1392±0.0340</b> | 0.1148±0.0292        | 0.1235±0.0309        | 0.1370±0.0314        | 0.1203±0.0356       | 0.1471±0.0296        | 0.1301±0.0406 | 0.1700±0.0297        | 0.1772±0.0505 | 0.1677±0.0477 | 0.1465±0.0428  |
| Portugal       | 6              |                      | <b>0.0504±0.0960</b> | 0.0575±0.0170        | 0.0706±0.0212        | 0.1070±0.0539       | 0.1435±0.0403        | 0.0624±0.0233 | 0.1132±0.0264        | 0.1212±0.0452 | 0.1151±0.0430 | 0.1459±0.0544  |
| Poland         | 3              |                      |                      | <b>0.0382±0.2720</b> | 0.0517±0.0250        | 0.0913±0.0611       | 0.1311±0.0499        | 0.0566±0.0271 | 0.1094±0.0345        | 0.1162±0.0549 | 0.1046±0.0493 | 0.1344±0.0634  |
| USA            | 4              |                      |                      |                      | <b>0.0691±0.1770</b> | 0.1028±0.0618       | 0.1406±0.0471        | 0.0686±0.0315 | 0.1028±0.0299        | 0.1073±0.0484 | 0.1000±0.0433 | 0.1426±0.0625  |
| France         | 2              |                      |                      |                      |                      | <b>0.1487±0.500</b> | 0.1045±0.0499        | 0.1058±0.0672 | 0.1390±0.0556        | 0.1461±0.0790 | 0.1307±0.0726 | 0.1025±0.0573  |
| Canada         | 6              |                      |                      |                      |                      |                     | <b>0.0821±0.1290</b> | 0.1353±0.0715 | 0.1555±0.0432        | 0.1729±0.0867 | 0.1548±0.0776 | 0.0559±0.0378  |
| Brazil         | 1              |                      |                      |                      |                      |                     |                      | <b>n.c.</b>   | 0.1098±0.0473        | 0.1114±0.0000 | 0.1145±0.0000 | 0.1371±0.0000  |
| China          | 6              |                      |                      |                      |                      |                     |                      |               | <b>0.0073±0.1220</b> | 0.0837±0.0357 | 0.1185±0.0505 | 0.1587±0.0681  |
| South Korea    | 1              |                      |                      |                      |                      |                     |                      |               |                      | <b>n.c.</b>   | 0.1145±0.0000 | 0.1757±0.0000  |
| Australia      | 1              |                      |                      |                      |                      |                     |                      |               |                      |               | <b>n.c.</b>   | 0.1470±0.0000  |
| Czech Republic | 1              |                      |                      |                      |                      |                     |                      |               |                      |               |               | <b>n.c.</b>    |

Nucleotide diversity within a group is reported in bold in the diagonal, while nucleotide diversity between groups are reported above the diagonal. <sup>a</sup> Nucleotide diversity was measured by the Jukes–Cantor method. <sup>b</sup> Number of isolates for each population; n.c., not calculated.
